# Supplementary material for: Au–Cd1−xZnxS core–alloyed shell nanocrystals: boosting the interfacial charge dynamics by adjusting the shell composition
Source: Royal Society of Chemistry journal article supplement (doi:10.1039/c8ta05539d), 2018-01-01
Supplement: c8ta05539d1.pdf [file c8ta05539d1.pdf]

## Electronic Supplementary Information

# **Au-Cd<sub>1-x</sub>Zn<sub>x</sub>S core-alloyed shell nanocrystals: boosting the interfacial charge dynamics by adjusting shell composition**

*Ying-Chih Pu<sup>a,‡,\*</sup>, Wei-Ta Chen<sup>b,‡</sup>, Mei-Jing Fang<sup>b</sup>, Yu-Lin Chen<sup>a</sup>, Kai-An Tsai<sup>b</sup>,*

*Wei-Hao Lin<sup>b</sup> and Yung-Jung Hsu<sup>b,c,\*</sup>*

<sup>a</sup> Department of Materials Science, National University of Tainan, Tainan 70005,  
Taiwan

<sup>b</sup> Department of Materials Science and Engineering, National Chiao Tung University,  
Hsinchu 30010, Taiwan

<sup>c</sup> Center for Emergent Functional Matter Science, National Chiao Tung University,  
Hsinchu 30010, Taiwan

\*Corresponding Author: Y.-C. Pu (ycpu@mail.nutn.edu.tw); Y.-J. Hsu  
(yhsu@cc.nctu.edu.tw)

‡These authors contributed equally.

(a)

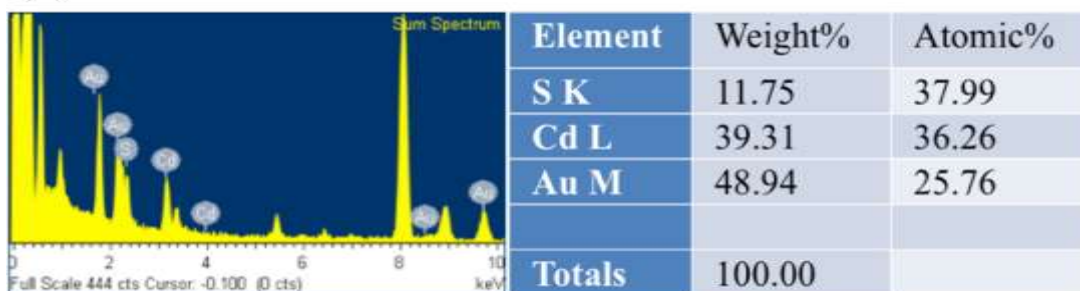

(b)

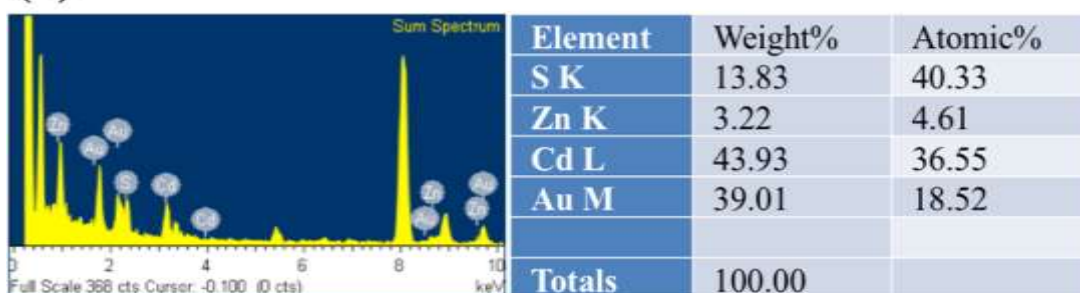

(c)

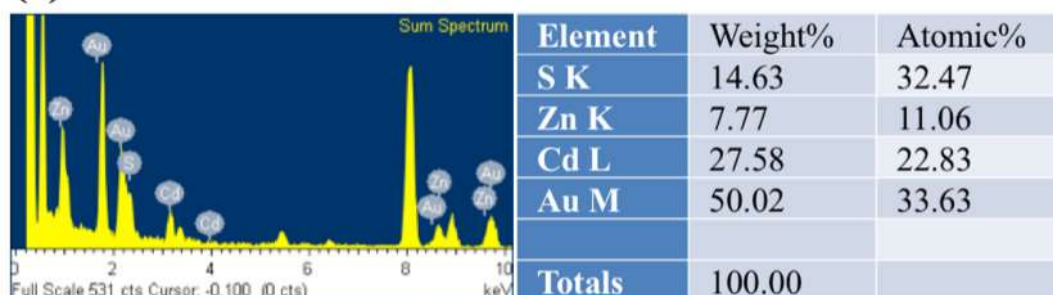

(d)

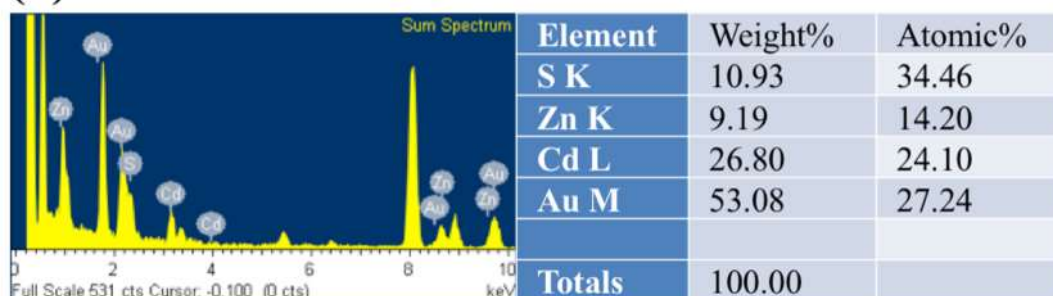

**Fig. S1** TEM-EDS analysis of (a) Au-CdS, (b) Au-Cd<sub>1-x</sub>Zn<sub>x</sub>S<sub>a</sub>, (c) Au-Cd<sub>1-x</sub>Zn<sub>x</sub>S<sub>b</sub>, and (d) Au-Cd<sub>1-x</sub>Zn<sub>x</sub>S<sub>c</sub>.

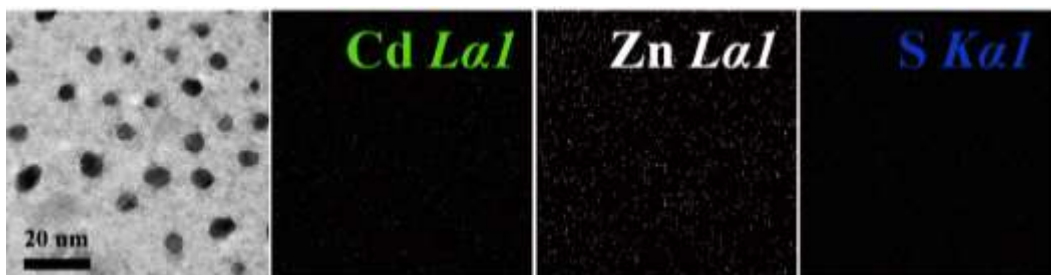

**Fig. S2** TEM-EDS elemental mapping taken on Au-Cd<sub>1-x</sub>Zn<sub>x</sub>S<sub>c</sub>.

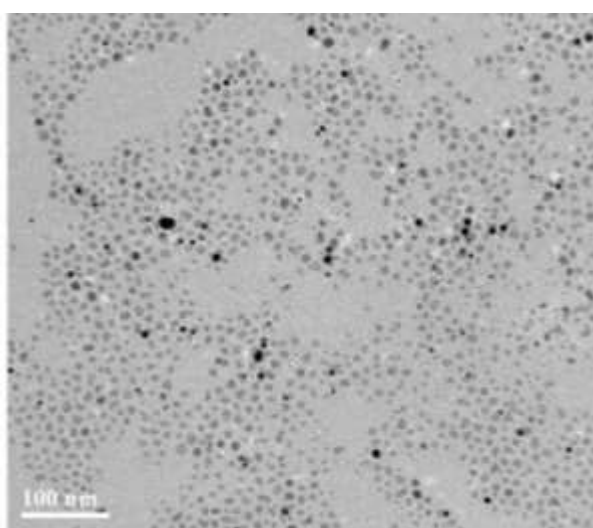

**Fig. S3** TEM image of Au-Cd<sub>1-x</sub>Zn<sub>x</sub>S NCs prepared at 270°C for 1 hr.

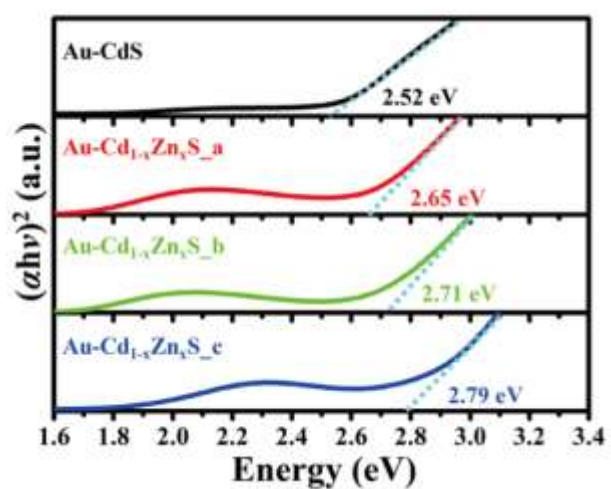

**Fig. S4**  $(\alpha h\nu)^2$  vs.  $h\nu$  plots for Au-CdS and Au-Cd<sub>1-x</sub>Zn<sub>x</sub>S NCs for determination of apparent bandgap.

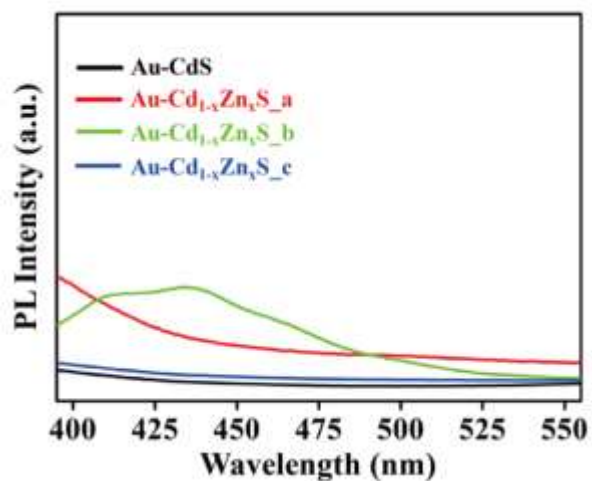

**Fig. S5** Steady-state PL spectra for Au-CdS and Au-Cd<sub>1-x</sub>Zn<sub>x</sub>S NCs.

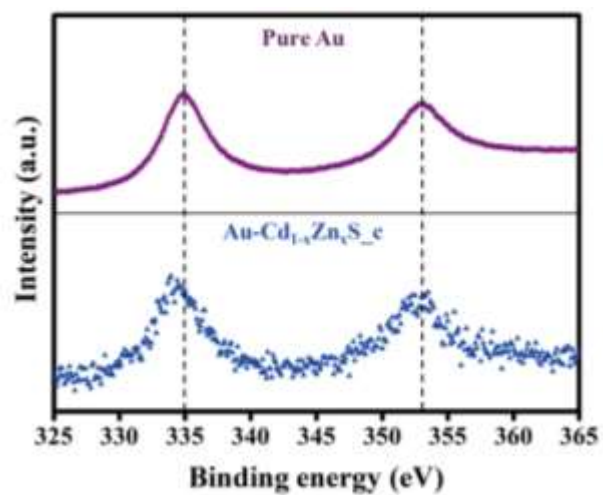

**Fig. S6** XPS spectra of Au 4d for pure Au and Au- Cd<sub>1-x</sub>Zn<sub>x</sub>S<sub>c</sub>.

**Table S1** Calculation results of the mole fraction of ZnS for Au-CdS and Au-Cd<sub>1-x</sub>Zn<sub>x</sub>S NCs based on the TEM-EDS examinations.

|                                          | Mole fraction of Zn/Cd in precursor solution | Atomic ratio of Zn/Cd in Cd <sub>1-x</sub> Zn <sub>x</sub> S shell from TEM-EDS analysis |
|------------------------------------------|----------------------------------------------|------------------------------------------------------------------------------------------|
| Au-CdS                                   | 0                                            | 0                                                                                        |
| Au-Cd <sub>1-x</sub> Zn <sub>x</sub> S_a | 1.0<br>(Zn:Cd = 0.5:0.5)                     | 0.13<br>(Zn:Cd = 0.11:0.89)                                                              |
| Au-Cd <sub>1-x</sub> Zn <sub>x</sub> S_b | 4.9<br>(Zn:Cd = 0.83:0.17)                   | 0.48<br>(Zn:Cd = 0.33:0.67)                                                              |
| Au-Cd <sub>1-x</sub> Zn <sub>x</sub> S_c | 9.0<br>(Zn:Cd = 0.9:0.1)                     | 0.59<br>(Zn:Cd = 0.37:0.63)                                                              |

**Table S2** Comparison of SPR  $\lambda_{\max}$  between experimental and theoretical results.

|                                          | Experimental SPR $\lambda_{\max}$ | Theoretical SPR $\lambda_{\max}$ |
|------------------------------------------|-----------------------------------|----------------------------------|
| Au-CdS                                   | 612 nm                            | 609 nm                           |
| Au-Cd <sub>1-x</sub> Zn <sub>x</sub> S_a | 600 nm                            | 598 nm                           |
| Au-Cd <sub>1-x</sub> Zn <sub>x</sub> S_b | 586 nm                            | 588 nm                           |
| Au-Cd <sub>1-x</sub> Zn <sub>x</sub> S_c | 580 nm                            | 582 nm                           |

**Table S3** Estimated  $E_g$  value of the shell for Au-CdS and Au-Cd<sub>1-x</sub>Zn<sub>x</sub>S from absorption spectra and optical bowing function.

|                                          | Estimate $E_g$ of Cd <sub>1-x</sub> Zn <sub>x</sub> S shell from UV-vis spectra | Estimate $E_g$ of Cd <sub>1-x</sub> Zn <sub>x</sub> S shell from constituent calculation |
|------------------------------------------|---------------------------------------------------------------------------------|------------------------------------------------------------------------------------------|
| Au-CdS                                   | 2.52 eV                                                                         | 2.50 eV                                                                                  |
| Au-Cd <sub>1-x</sub> Zn <sub>x</sub> S_a | 2.65 eV                                                                         | 2.57 eV                                                                                  |
| Au-Cd <sub>1-x</sub> Zn <sub>x</sub> S_b | 2.71 eV                                                                         | 2.76 eV                                                                                  |
| Au-Cd <sub>1-x</sub> Zn <sub>x</sub> S_c | 2.79 eV                                                                         | 2.80 eV                                                                                  |

<sup>a</sup> $E_g(Cd_{1-x}Zn_xS) = E_g(CdS)(1 - x) + E_g(ZnS)x - bx(1 - x)$ .  $E_g(CdS) = 2.5$  eV;  $E_g(ZnS) = 3.7$  eV;  $b = 0.6$ ; <sup>1,2</sup>  $x = 0, 0.11, 0.31$  and  $0.37$  for Au-CdS, Au-Cd<sub>1-x</sub>Zn<sub>x</sub>S\_a, Au-Cd<sub>1-x</sub>Zn<sub>x</sub>S\_b, Au-Cd<sub>1-x</sub>Zn<sub>x</sub>S\_c and Au-Cd<sub>1-x</sub>Zn<sub>x</sub>S\_d.

**Table S4** Calculations of  $E_{cb}$  of the shell and  $\Delta G$  for Au-CdS and Au-Cd<sub>1-x</sub>Zn<sub>x</sub>S NCs.

| entry                                    | $E_{cb}$ (V vs NHE) | $E_{vb}$ (V vs NHE) | $\Delta G$ (V) |
|------------------------------------------|---------------------|---------------------|----------------|
| Au-CdS                                   | -1.05               | +1.47               | -1.55          |
| Au-Cd <sub>1-x</sub> Zn <sub>x</sub> S-a | -1.10               | +1.55               | -1.60          |
| Au-Cd <sub>1-x</sub> Zn <sub>x</sub> S-b | -1.12               | +1.59               | -1.62          |
| Au-Cd <sub>1-x</sub> Zn <sub>x</sub> S-c | -1.15               | +1.64               | -1.65          |

The  $E_{cb}$  of Cd<sub>x</sub>Zn<sub>y</sub>S<sub>z</sub> nanocrystals can be calculated by using following formulas:<sup>2,3</sup>

$$E_{cb} = E^e - X + \frac{1}{2}E_g$$

$$X = \{X_{Cd}^x \times X_{Zn}^y \times X_S^z\}^{\frac{1}{(x+y+z)}}$$

$$X_{Cd} = \frac{1}{2}(A_{Cd} + I_{Cd})$$

$$X_{Zn} = \frac{1}{2}(A_{Zn} + I_{Zn})$$

$$X_S = \frac{1}{2}(A_S + I_S)$$

Here, A is the electron affinity ( $A_S = 200$  kJ/mol,  $A_{Cd} = \sim 0$  kJ/mol,  $A_{Zn} = \sim 0$  kJ/mol), I is the ionization energy ( $I_{Cd} = 866$  kJ/mol,  $I_{Zn} = 904$  kJ/mol,  $I_S = 1000$  kJ/mol),  $E^e = 4.5$  eV,  $E_g$  is the bandgap determined from  $(\alpha hv)^2$  vs.  $hv$  plots in Fig S3.

## References

1. J.-H. Lee, W.-C. Song, J.-S. Yi, K.-J. Yang, W.-D. Han and J. Hwang, *Thin Solid Films*, 2003, **431-432**, 349-353
2. X. Zhong, Y. Feng, W. Knoll and M. Han, *J. Am. Chem. Soc.*, 2003, **125**, 13559-13563.
3. C. Xing, Y. Zhang, W. Yan and L. Guo, *Int. J. Hydrogen Energy*, 2006, **31**, 2018-2024.
4. A. T. Nguyen, W.-H. Lin, Y.-H. Lu, Y.-D. Chiou and Y.-J. Hsu, *Appl. Catal. A- Gen.*, 2014, **476**, 140-147.
